# Supplementary material for: Action of Multiple Rice β-Glucosidases on Abscisic Acid Glucose Ester
Source: MDPI journal article supplement (doi:10.3390/ijms22147593), 2021-07-15

## Supplementary data

# Action of multiple rice $\beta$ -glucosidases on abscisic acid glucose ester

Manatchanok Kongdin<sup>1</sup>, Bancha Mahong<sup>2</sup>, Sang- Kyu Lee<sup>2</sup>, Su- Hyeon Shim<sup>2</sup>, Jong-Seong Jeon<sup>2,\*</sup>, and James R. Ketudat Cairns<sup>1,\*</sup>

<sup>1</sup> School of Chemistry, Institute of Science, Center for Biomolecular Structure, Function and Application, Suranaree University of Technology, Nakhon Ratchasima 30000, Thailand

<sup>2</sup> Graduate School of Biotechnology and Crop Biotech Institute, Kyung Hee University, Yongin 17104, Korea

\* Correspondences: JJ, jjeon@khu.ac.kr, Tel.: +82 31 2012025 and JKC, cairns@sut.ac.th, Tel: +66 44 224304, Fax: +66 44 224185

**Supplementary Table S1.** PCR primers used in this study.

**Supplementary Figure S1** Subcellular localization of Os4BGlu10-GFP and Os4BGlu13-GFP in coleoptile cells of transgenic rice plants

**Supplementary Figure S2** Root and shoot lengths of seedlings of wild type Arabidopsis and transgenic lines expressing rice  $\beta$ -glucosidases under control conditions.

**Supplementary Figure S3.** Sodium dodecyl sulfate polyacrylamide gel electrophoresis analysis of *E. coli*-expressed Os4BGlu12 and Os4BGlu13 purified by IMAC and cut with enterokinase.

**Supplementary Table S1.** PCR primers used in this study.

| Primer name         | Sequence (5'→3')                     |
|---------------------|--------------------------------------|
| Os4BGlu9 cloning F  | 5'-CACCGAATTGCAGGTCAAGCTTCGT-3'      |
| Os4BGlu9 cloning R  | 5'-ACACATTGGGATTAAGTGCCAA-3'         |
| Os4BGlu10 cloning F | 5'-CACCCACTCTTTTCTGTCTATGTAGG -3'    |
| Os4BGlu10 cloning R | 5'-CATGCAAGAAGAGGAGAGTGAG-3'         |
| Os4BGlu11 cloning F | 5'-TCTTCTGTCTATGTAGGTCATG-3'         |
| Os4BGlu11cloning R  | 5'-CTTATATACTATTTTCGATGTTC-3'        |
| Os4BGlu12 cloning F | 5'-GTTGATGGCACCAAACATTG-3'           |
| Os4BGlu12 cloning R | 5'-AAGCAATGAGTGCAATGGTGC-3'          |
| Os4BGlu13 cloning F | 5'-CACCGCGGGTCACACACACATACT3'        |
| Os4BGlu13 cloning R | 5'-GGGAAGAGCAATGTGTGCAACT-3'         |
| GFPBGlu9F           | 5'-CACCATGGCGGTTGCCGGGGCAGTGGCGA-3'  |
| GFPBGlu9R           | 5'-ATGTCTGTACTGGCAAACCTCT-3'         |
| GFPBGlu10F          | 5'-CACCATGGCGGTTGCAGGTGCAATGGTGAT-3' |
| GFPBGlu10R          | 5'-TTTCCGGAGGAACTTCTTGAACCA-3'       |
| GFPBGlu11F          | 5'-CACCATGGCGGTTGCAGGGGCAATGGT-3'    |
| GFPBglu11R          | 5'-ATTAGAAAAGGCATTGTATGCA-3'         |
| GFPBGlu12F          | 5'-CACCATGGCAGATGGAAGTCTGAGGGGTGG-3' |
| GFPBGlu12R          | 5'-TTTCAGGAGGAACTTCTTGAACCAAT-3'     |
| GFPBGlu13F          | 5'-CACCATGGCAGCTGCAGGGGAAGTGGTGA-3'  |
| GFPBGlu13R          | 5'-TTTCTGGAGGAACTCCTTGAACC-3'        |
| RTBGlu9F            | 5'-GCACTGGAAGATAAATAACAACGATT-3'     |
| RTBGlu9R            | 5'-TGATATTTCTCTCTGTACAACCGAA-3'      |
| RTBGlu10F           | 5'-TGAAATCAATAATAAGACCATGCGAC-3'     |
| RTBGlu10R           | 5'-TCATTTCCGGAGGAACTTCTTGAACCA-3'    |
| RTBGlu11F           | 5'-CACCTCTTCTGTCTATGTAGGTCATG -3'    |
| RTBGlu11R           | 5'-TCAATTAGAAAAGGCATTGTATGCAAC-3'    |
| RTBGlu12F           | 5'-CACCGTTGATGGCACCAAACATTG-3'       |
| RTBGlu12R           | 5'-TCATTTCAGGAGGAACTTCTTGAACCAAT-3'  |
| RTBGlu13F           | 5'-TGAATTCAACAATAAGACCTTACCACT-3'    |
| RTBGlu13R           | 5'-TCATTTCTGGAGGAACTCCTTGAACC-3'     |

**Supplementary Figure S1** Subcellular localization of Os4BGlu10-GFP and Os4BGlu13-GFP in coleoptile cells of transgenic rice plants. (A-H) Coleoptile cells of Os4BGlu10-GFP (A-D) and Os4BGlu13-GFP (E-H). A and E, GFP fluorescence. B and F, FM4-64 red signal. C and G, Bright field. D and H, Merged. (I-P) Plasmolysed coleoptile cells of Os4BGlu10-GFP (I-L) and Os4BGlu13-GFP (M-P). I and M, GFP fluorescence. J and N, FM4-64 red signal. K and O, Bright field. L and P, Merged.

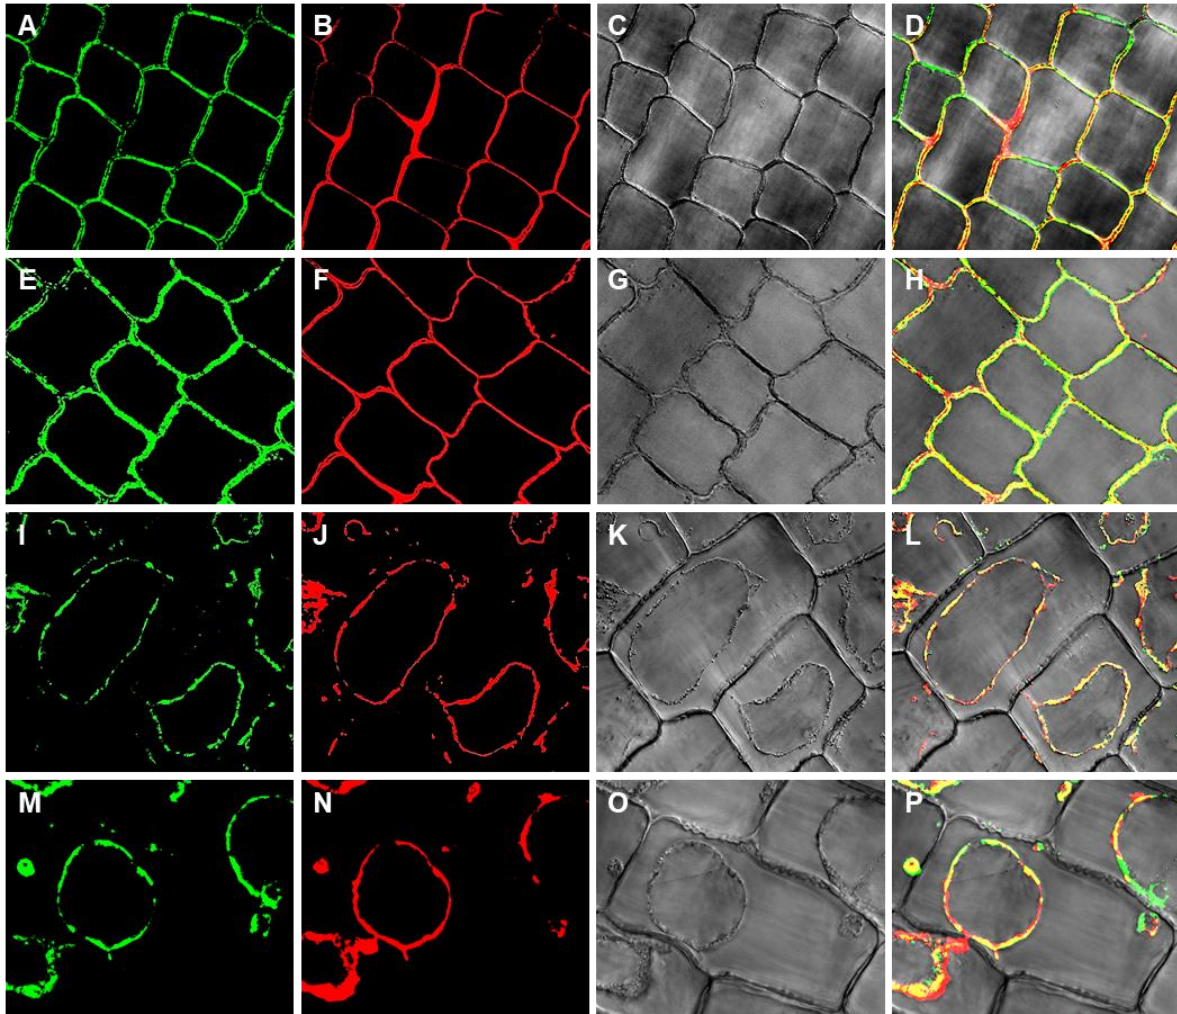

**Supplementary Figure S2** Root and shoot lengths of seedlings of control Arabidopsis and transgenic lines expressing rice  $\beta$ -glucosidases under control conditions. Control and transgenic Arabidopsis expressing rice phytohormone  $\beta$ -glucosidases Os4BGlu9-13 were grown on  $\frac{1}{2}$  MS plates for 7 d and transplanted to  $\frac{1}{2}$  MS for 5 d. To quantify root and shoot growth inhibition, root and shoot lengths were measured in three independent experiments with 20 plants each

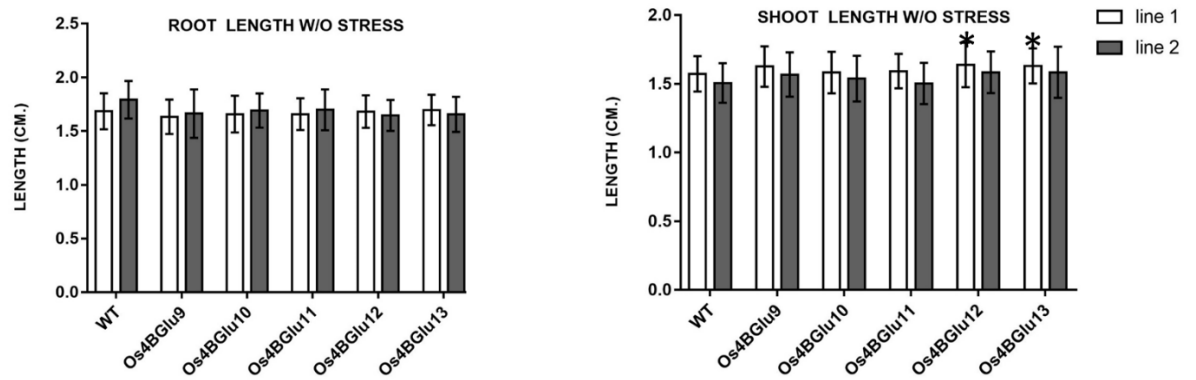

**Supplementary Figure S3.** Sodium dodecyl sulfate polyacrylamide gel electrophoresis analysis of *E. coli*-expressed Os4BGlu12 and Os4BGlu13 purified by IMAC and cut with enterokinase. Lane 1: Low Molecular Weight Protein Marker (GE Healthcare); Lane 2: Os4BGlu12; and Lane 3: Os4BGlu13.

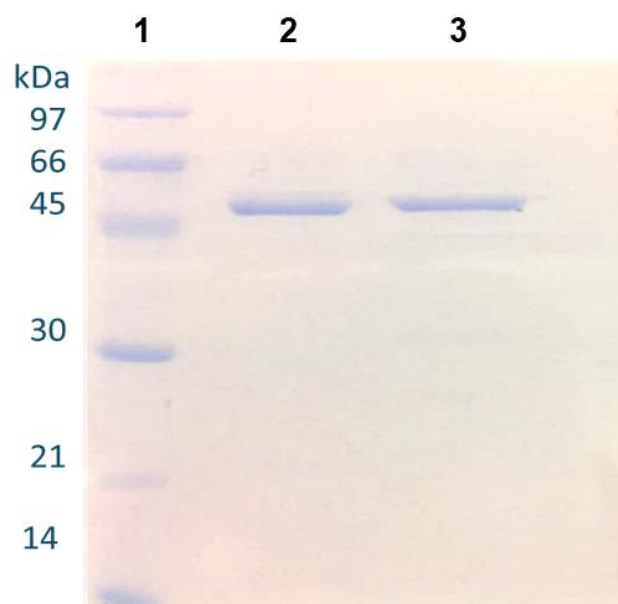

Supplement: s1 [file s1]
